# Supplementary material
Source: Springer Nature journal article supplement (https://www.springermedizin.de/resource/supplementary/12889_2012_4980_MOESM1_ESM.pdf/9493346)
Supplement: MOESM1 [file 9493346]

Enrollment:

N=300

Year 1:

INTERVENTION

Year 2:

CROSSOVER

Pharmacist +  
Health Promoter

Pharmacist +  
Health Promoter

Usual Care

RANDOMIZE

Pharmacist

Pharmacist

**A**

**B**

*intensification*

**C**

*maintenance*

**D**
